# Supplementary material
Source: MDPI journal article supplement (https://www.mdpi.com/2311-7524/7/9/313)
Supplement: s1 [file s1]

# Supplementary Materials: Biostimulatory Action of Vegetal Protein Hydrolysate and the Configuration of Fruit Physicochemical Characteristics in Grafted Watermelon

Georgios A. Soteriou <sup>1</sup>, Youssef Rouphael <sup>2</sup>, Maria G. Emmanouilidou <sup>3</sup>, Chrystalla Antoniou <sup>1</sup>, Angelos C. Kyrtzizis <sup>1</sup>, Marios C. Kyriacou <sup>1,\*</sup>

**Table S1.** Timetable of the experiment.

| Date   | 2020/5/5               | 2020/6/6           | 2020/6/16     | 2020/6/26     | 2020/7/6      | 2020/7/16     | 2020/7/26     |
|--------|------------------------|--------------------|---------------|---------------|---------------|---------------|---------------|
| Action | Plants transplantation | Crop fruit setting | Harvest 10dpa | Harvest 20dpa | Harvest 30dpa | Harvest 40dpa | Harvest 50dpa |

**Table S2.** Mean comparisons for pulp firmness, fruit rind, flesh CIELAB color components and lycopene content of watermelon cv. Obla harvested at 10, 20, 30, 40 and 50 days post-anthesis with (PH) or without (Control) protein hydrolysate biostimulant application.

| Source of variance | Firmness (kg-force) | Rind (mm)      | L* (0–100)     | C* $\sqrt{(a^{*2} + b^{*2})}$ | h° (0–360°)     | a* (0–60)      | Lycopene ( $\mu\text{g g}^{-1}$ f.w.) |
|--------------------|---------------------|----------------|----------------|-------------------------------|-----------------|----------------|---------------------------------------|
| Control 10         | 5.07 ± 0.2 a        | 5.06 ± 0.54 b  | 76.16 ± 0.58 a | 8.94 ± 0.47 d                 | 103.12 ± 0.34 a | −2.02 ± 0.12 d | 0.23 ± 0.12 e                         |
| 20                 | 4.84 ± 0.18 a       | 10.59 ± 0.78 a | 54.74 ± 0.8 b  | 19.93 ± 1.00 c                | 35.07 ± 1.39 b  | 16.36 ± 1.03 c | 22.09 ± 2.34 d                        |
| 30                 | 3.72 ± 0.18 b       | 10.69 ± 0.51 a | 46.69 ± 0.84 c | 32.12 ± 0.55 b                | 32.29 ± 0.45 c  | 27.11 ± 0.34 b | 59.21 ± 0.78 c                        |
| 40                 | 3.52 ± 0.19 b       | 10.52 ± 0.42 a | 41.96 ± 0.99 d | 36.61 ± 1.17 a                | 31.51 ± 0.70 c  | 31.12 ± 0.77 a | 92.46 ± 1.75 a                        |
| 50                 | 3.44 ± 0.33 b       | 10.45 ± 0.77 a | 42.11 ± 0.95 d | 34.64 ± 0.87 a                | 32.91 ± 0.38 bc | 29.05 ± 0.62 a | 79.06 ± 4.21 b                        |
| Trainer 10         | 4.74 ± 0.09 a       | 4.03 ± 0.03 b  | 78.67 ± 0.55 a | 8.32 ± 0.30 d                 | 103 ± 0.41 a    | −1.86 ± 0.07 d | 0.3 ± 0.09 e                          |
| 20                 | 4.6 ± 0.09 a        | 9.73 ± 0.53 a  | 54.67 ± 1.12 b | 21.17 ± 0.90 c                | 34.52 ± 1.47 b  | 17.4 ± 0.94 c  | 24.77 ± 2.01 d                        |
| 30                 | 3.58 ± 0.2 b        | 11.99 ± 0.29 a | 45.21 ± 0.92 c | 30.60 ± 0.95 b                | 31.77 ± 0.32 c  | 26 ± 0.75 b    | 52.72 ± 1.95 c                        |
| 40                 | 3.32 ± 0.11 b       | 10.84 ± 0.66 a | 42.86 ± 0.88 d | 36.09 ± 0.35 a                | 32.37 ± 0.66 c  | 30.45 ± 0.46 a | 83.44 ± 3.99 a                        |

|    |            |   |             |   |              |   |              |   |              |    |              |   |              |   |
|----|------------|---|-------------|---|--------------|---|--------------|---|--------------|----|--------------|---|--------------|---|
| 50 | 3.3 ± 0.37 | b | 11.13 ± 1.3 | a | 43.17 ± 1.99 | d | 35.41 ± 1.15 | a | 33.13 ± 0.36 | bc | 29.58 ± 1.04 | a | 73.76 ± 4.27 | b |
|    | ***        |   | ***         |   | ***          |   | ***          |   | ***          |    | ***          |   | ***          |   |

\*\*\* significant effect at the 0.001 level. Values within columns followed by the same letter are not significantly different according to Tukey-Kramer HSD Test ( $P < 0.05$ ).

**Table S3.** Mean comparisons for fruit content in soluble solids (SSC), glucose, fructose, sucrose, total soluble carbohydrates, sweetness index and titratable acidity (TA) obtained from watermelon cv. Obla harvested at 10, 20, 30, 40 and 50 days post-anthesis with (PH) or without (Control) protein hydrolysate biostimulant application.

| Source of variance | SSC (%) |              | Fructose (µg ml <sup>-1</sup> ) |              | Glucose (µg ml <sup>-1</sup> ) |              | Sucrose (µg ml <sup>-1</sup> ) |              | Total Sugars (µg ml <sup>-1</sup> ) |               | Sweetness Index |                 | TA (%) ) |             |    |
|--------------------|---------|--------------|---------------------------------|--------------|--------------------------------|--------------|--------------------------------|--------------|-------------------------------------|---------------|-----------------|-----------------|----------|-------------|----|
| Control            | 10      | 5.06 ± 0.25  | c                               | 19.17 ± 1.23 | d                              | 17.14 ± 1.23 | d                              | 0.01 ± 0.01  | d                                   | 36.31 ± 2.44  | c               | 417.57 ± 27.44  | d        | 0.19 ± 0.01 | b  |
|                    | 20      | 9.89 ± 0.31  | b                               | 39.96 ± 0.86 | a                              | 34.27 ± 0.91 | a                              | 4.91 ± 1.11  | d                                   | 79.15 ± 2.61  | b               | 909.85 ± 28.35  | c        | 0.20 ± 0.01 | a  |
|                    | 30      | 12.54 ± 0.19 | a                               | 38.55 ± 0.87 | a                              | 29.61 ± 1.27 | b                              | 33.64 ± 2.5  | c                                   | 101.8 ± 1.34  | a               | 1143.38 ± 10.43 | a        | 0.15 ± 0.01 | bc |
|                    | 40      | 13.07 ± 0.33 | a                               | 29.42 ± 0.79 | b                              | 23.25 ± 1.29 | c                              | 53.36 ± 2.66 | b                                   | 106.03 ± 1.45 | a               | 1153.86 ± 14.84 | a        | 0.13 ± 0.01 | c  |
|                    | 50      | 12.21 ± 0.16 | a                               | 23.99 ± 0.58 | c                              | 18.13 ± 0.80 | d                              | 56.33 ± 2.01 | a                                   | 98.45 ± 1.74  | a               | 1063.45 ± 17.75 | b        | 0.15 ± 0.01 | bc |
| Trainer            | 10      | 4.84 ± 0.24  | c                               | 17.15 ± 1.32 | d                              | 15.42 ± 1.26 | d                              | 0.01 ± 0.01  | d                                   | 32.58 ± 2.58  | c               | 374.35 ± 29.28  | d        | 0.16 ± 0.01 | b  |
|                    | 20      | 10.09 ± 0.27 | b                               | 40.88 ± 0.79 | a                              | 35.89 ± 0.89 | a                              | 4.41 ± 0.86  | d                                   | 81.18 ± 2.01  | b               | 930.22 ± 21.80  | c        | 0.20 ± 0.01 | a  |
|                    | 30      | 12.20 ± 0.30 | a                               | 42.13 ± 1.34 | a                              | 33.08 ± 0.84 | b                              | 24.41 ± 2.58 | c                                   | 99.63 ± 2.27  | a               | 1131.01 ± 22.92 | a        | 0.18 ± 0.01 | b  |
|                    | 40      | 12.79 ± 0.18 | a                               | 30.10 ± 0.70 | b                              | 23.76 ± 0.41 | c                              | 49.78 ± 2.02 | b                                   | 103.65 ± 1.57 | a               | 1132.37 ± 14.27 | a        | 0.14 ± 0.01 | c  |
|                    | 50      | 12.72 ± 0.12 | a                               | 23.14 ± 1.32 | c                              | 16.79 ± 1.00 | d                              | 59.24 ± 2.86 | a                                   | 99.17 ± 0.64  | a               | 1070.25 ± 2.30  | b        | 0.15 ± 0.01 | bc |
|                    | ***     |              | ***                             |              | ***                            |              | ***                            |              | ***                                 |               | ***             |                 | ***      |             |    |

\*\*\* significant effect at the 0.001 level. Values within columns followed by the same letter are not significantly different according to Tukey-Kramer HSD Test ( $P < 0.05$ ).

**Table S4.** Mean comparisons for fruit content in K, Mg, Ca, P and dry matter (DM) obtained from watermelon cv. Obla harvested at 10, 20, 30, 40 and 50 days post-anthesis with (PH) or without (Control) protein hydrolysate biostimulant application.

| Source of variance | K<br>(g/kg d.m.) |   | Mg<br>(g/kg d.m.) |   | Ca<br>(g/kg d.m.) |    | P<br>(g/kg d.m.) |   | DM (%)      |   |
|--------------------|------------------|---|-------------------|---|-------------------|----|------------------|---|-------------|---|
| Control 10         | 18.05 ± 1.91     | a | 1.17 ± 0.11       | b | 1.46 ± 0.08       | a  | 0.95 ± 0.07      | b | 5.11 ± 0.35 | c |
| 20                 | 14.90 ± 0.57     | b | 1.56 ± 0.06       | a | 1.04 ± 0.07       | b  | 1.85 ± 0.11      | a | 9.36 ± 0.29 | b |
| 30                 | 13.23 ± 0.43     | c | 1.54 ± 0.02       | a | 0.69 ± 0.05       | bc | 1.84 ± 0.08      | a | 12.2 ± 0.15 | a |

|            |              |    |             |   |             |    |             |   |              |   |
|------------|--------------|----|-------------|---|-------------|----|-------------|---|--------------|---|
| 40         | 13.96 ± 0.73 | bc | 1.52 ± 0.05 | a | 0.57 ± 0.05 | c  | 1.88 ± 0.13 | a | 12.59 ± 0.17 | a |
| 50         | 13.94 ± 0.65 | bc | 1.62 ± 0.07 | a | 0.63 ± 0.08 | c  | 1.91 ± 0.10 | a | 11.94 ± 0.29 | a |
| Trainer 10 | 22.23 ± 0.75 | a  | 1.38 ± 0.11 | b | 2.02 ± 0.25 | a  | 1.11 ± 0.10 | b | 7.91 ± 3.28  | c |
| 20         | 15.04 ± 0.33 | b  | 1.49 ± 0.07 | a | 0.98 ± 0.10 | b  | 1.56 ± 0.09 | a | 9.73 ± 0.23  | b |
| 30         | 12.18 ± 0.49 | c  | 1.55 ± 0.03 | a | 0.76 ± 0.07 | bc | 1.49 ± 0.06 | a | 12.11 ± 0.39 | a |
| 40         | 14.73 ± 0.30 | bc | 1.61 ± 0.05 | a | 0.61 ± 0.04 | c  | 1.99 ± 0.08 | a | 12.49 ± 0.23 | a |
| 50         | 13.39 ± 0.11 | bc | 1.60 ± 0.05 | a | 0.64 ± 0.06 | c  | 1.73 ± 0.07 | a | 12.45 ± 0.31 | a |
|            | ***          |    | ***         |   | ***         |    | ***         |   | ***          |   |

\*\*\* significant effect at the 0.001 level. Values within columns followed by the same letter are not significantly different according to Tukey-Kramer HSD Test ( $P < 0.05$ ).
